# Supplementary material for: EGFR/HER-2 inhibitors: synthesis, biological evaluation and 3D-QSAR analysis of dihydropyridine-containing thiazolinone derivatives
Source: Royal Society of Chemistry journal article supplement (doi:10.1039/c4ra10606g), 2015-01-01
Supplement: c4ra10606g1.pdf [file c4ra10606g1.pdf]

# Supplementary Information for EGFR/HER-2 Inhibitors: Synthesis, Biological Evaluation, 3D – QSAR Analysis of Dihydropyridin Containing Thiazolinone Derivatives

<sup>1</sup>H NMR spectra of compounds:

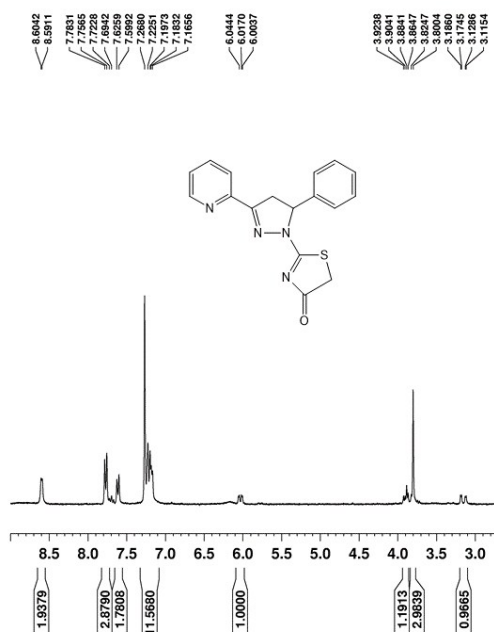

4a

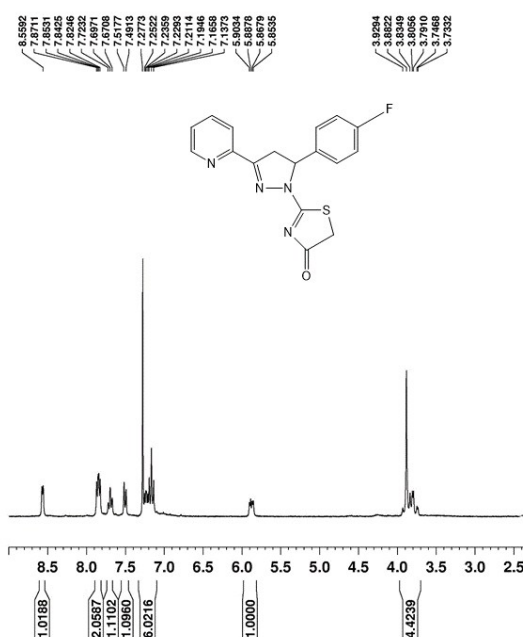

4d

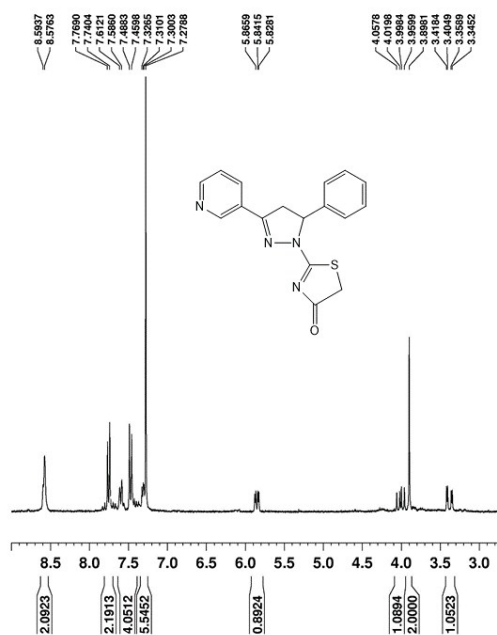

4g

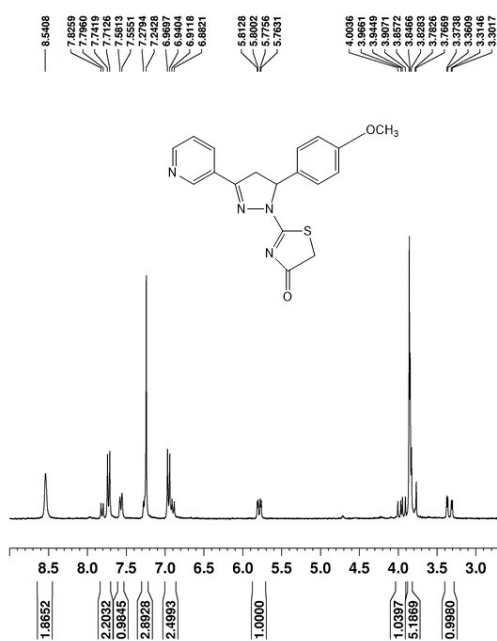

4i

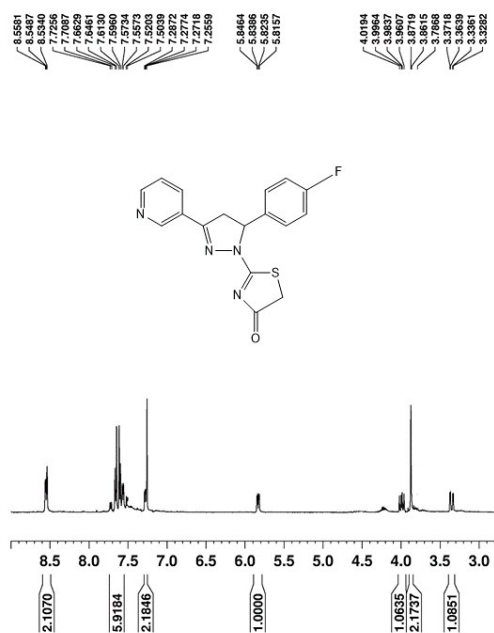

**4j**

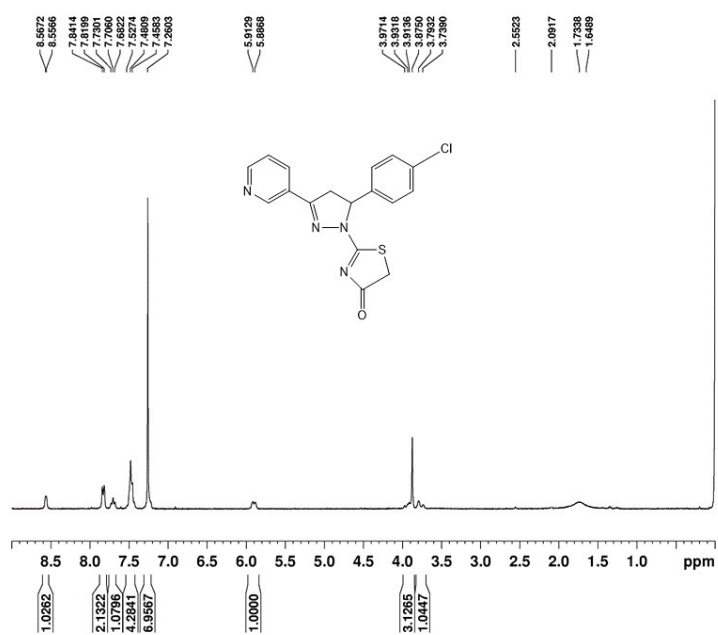

**4k**

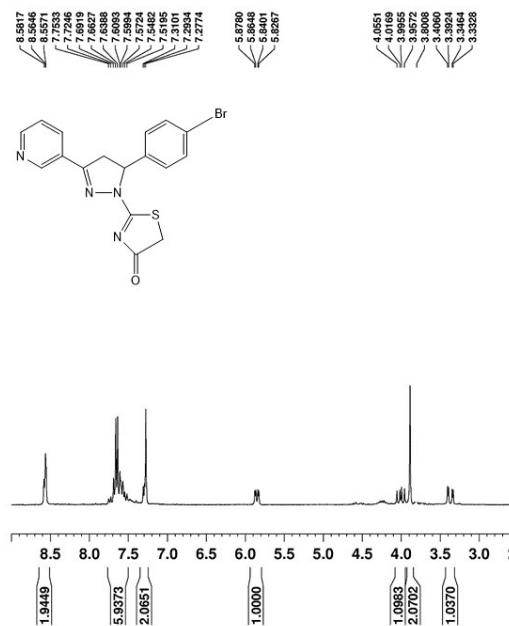

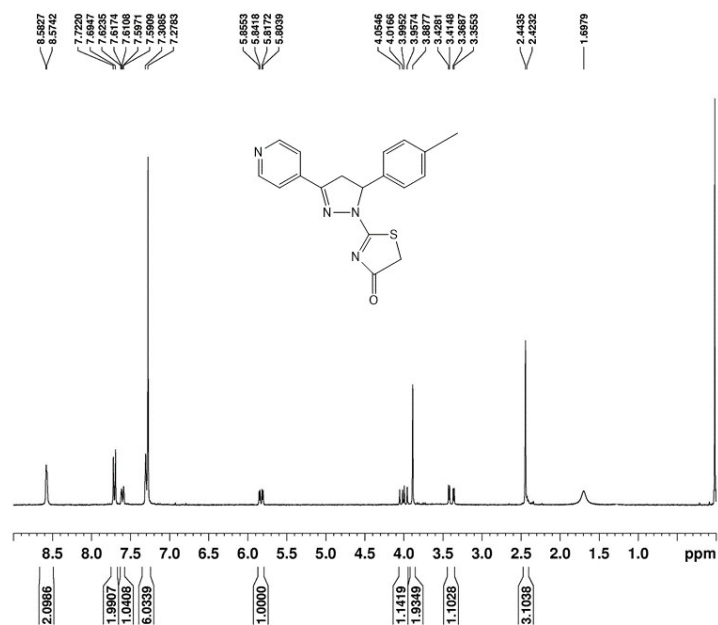

**4n**

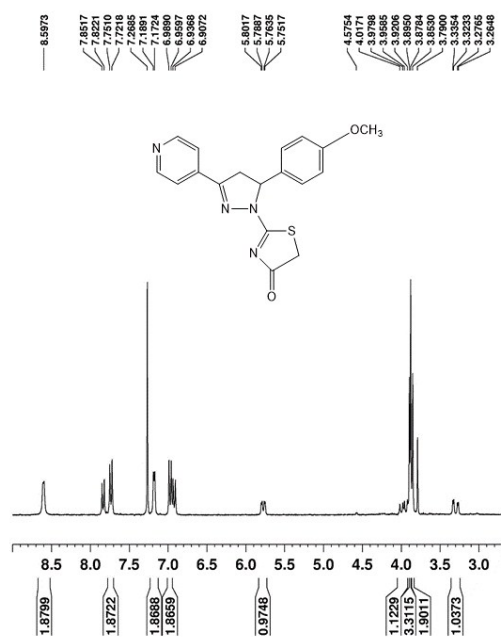

**4o**

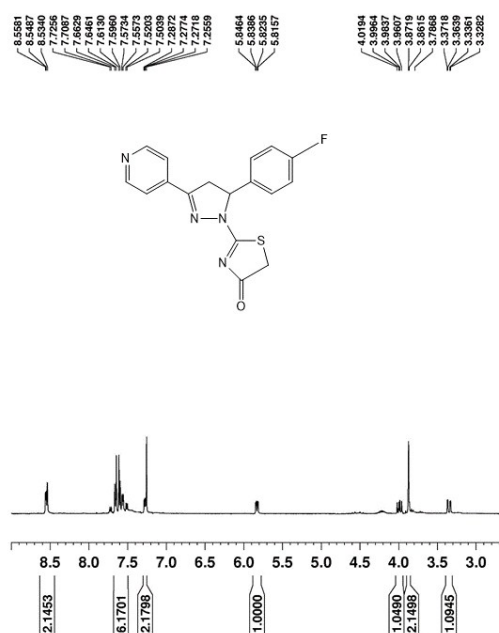

**4p**

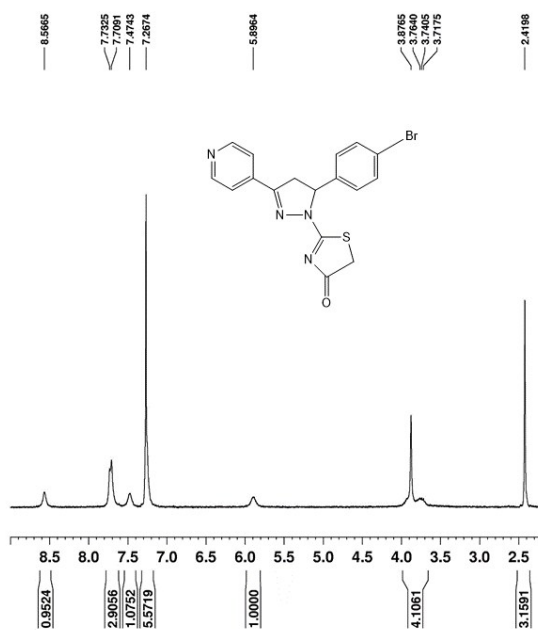

**4r**
